# Supplementary material for: The burden of attempted hanging and drowning presenting to hospitals in Ireland between 2007 and 2019: a national registry-based study
Source: Springer Nature journal article supplement (doi:10.1007/s00127-023-02525-w), 2023-07-31
Supplement: MOESM1 [file 25868414]

## Supplementary Information

**Table S1.** Gender-age groups of individuals at time of presentation to emergency departments after attempted hanging and drowning, Ireland, 2007-2019 (n=152,489)

|                     |       | Hanging presentations<br>(n=9,605)<br>n (%) | Drowning presentations<br>(n=4,637)<br>n (%) | Presentations for all other methods<br>(n=138,247)<br>n (%) |
|---------------------|-------|---------------------------------------------|----------------------------------------------|-------------------------------------------------------------|
| <b>Both genders</b> |       |                                             |                                              |                                                             |
| Age (years)         | <15   | 356 (3.71)                                  | 28 (0.60)                                    | 4,033 (2.92)                                                |
|                     | 15-24 | 3,265 (33.99)                               | 1,234 (26.61)                                | 43,195 (31.24)                                              |
|                     | 25-34 | 2,737 (28.50)                               | 1,295 (27.93)                                | 32,829 (23.75)                                              |
|                     | 35-44 | 1,765 (18.38)                               | 888 (19.15)                                  | 27,652 (20.00)                                              |
|                     | 45-54 | 975 (10.15)                                 | 691 (14.90)                                  | 19,121 (13.83)                                              |
|                     | ≥55   | 507 (5.28)                                  | 501 (10.80)                                  | 11,417 (8.26)                                               |
| <b>Males</b>        |       |                                             |                                              |                                                             |
| Age (years)         | <15   | 204 (3.10)                                  | 15 (0.55)                                    | 872 (1.45)                                                  |
|                     | 15-24 | 2,198 (33.44)                               | 684 (24.99)                                  | 17,871 (29.65)                                              |
|                     | 25-34 | 1,912 (29.09)                               | 785 (28.68)                                  | 16,397 (27.21)                                              |
|                     | 35-44 | 1,240 (18.87)                               | 558 (20.39)                                  | 12,696 (21.07)                                              |
|                     | 45-54 | 662 (10.07)                                 | 412 (15.05)                                  | 7,745 (12.85)                                               |
|                     | ≥55   | 356 (5.42)                                  | 283 (10.34)                                  | 4,685 (7.77)                                                |
| <b>Females</b>      |       |                                             |                                              |                                                             |
| Age (years)         | <15   | 152 (5.01)                                  | 13 (0.68)                                    | 3,161 (4.05)                                                |
|                     | 15-24 | 1,067 (35.18)                               | 550 (28.95)                                  | 25,324 (32.47)                                              |
|                     | 25-34 | 825 (27.20)                                 | 510 (26.84)                                  | 16,432 (21.07)                                              |
|                     | 35-44 | 525 (17.31)                                 | 330 (17.37)                                  | 14,956 (19.18)                                              |
|                     | 45-54 | 313 (10.32)                                 | 279 (14.68)                                  | 11,376 (14.59)                                              |
|                     | ≥55   | 151 (4.98)                                  | 218 (11.47)                                  | 6,732 (8.63)                                                |

Note: Some individuals presented more than once for attempted hanging, drowning and all other methods.
